# Supplementary material
Source: PubMed Central journal article supplement (PMC6238608)
Supplement: Supp_Fig1.pdf [file Supp_Fig1.pdf]

## Supplementary Data

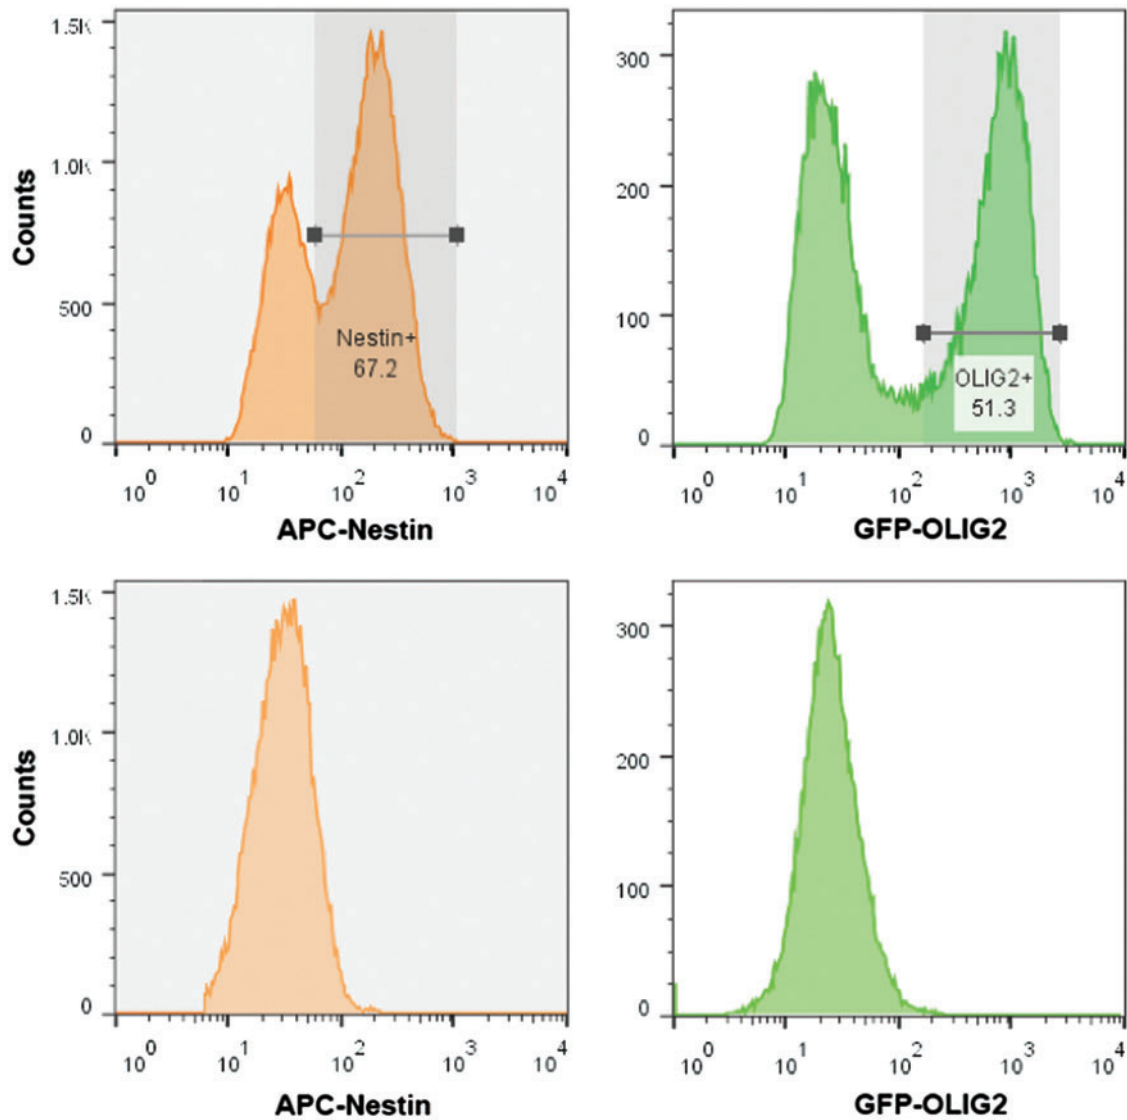

**SUPPLEMENTARY FIG. S1.** Flow cytometry was used to generate histograms of cell counts cultured within bridges or neurospheres to evaluate Nestin<sup>+</sup> and Nestin<sup>+</sup>OLIG2<sup>+</sup> phenotypes. Cells were gated for the following: singlets > viable cells > Nestin > OLIG2. Examples of positive samples (*top*) and negative staining controls (*bottom*) are provided for each phenotype.
