# Supplementary material
Source: PubMed Central journal article supplement (PMC6238608)
Supplement: Supp_Fig2.pdf [file Supp_Fig2.pdf]

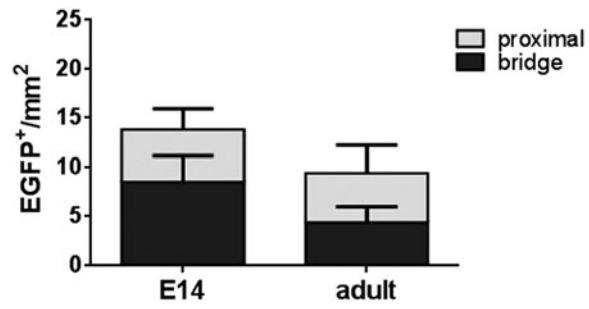

**SUPPLEMENTARY FIG. S2.** EGFP<sup>+</sup> spinal progenitors survive 8 weeks after transplantation. Transplanted EGFP<sup>+</sup> spinal progenitors remain in the bridge with some cells migrating into the proximal tissue 8 weeks after transplantation. The overall transplant survival by week 8 has dropped to 0.3% (E14) and 0.17% (adult) compared to initial transplant density. EGFP, enhanced green fluorescent protein.
