# Supplementary material
Source: PubMed Central journal article supplement (PMC6238608)
Supplement: Supp_Fig3.pdf [file Supp_Fig3.pdf]

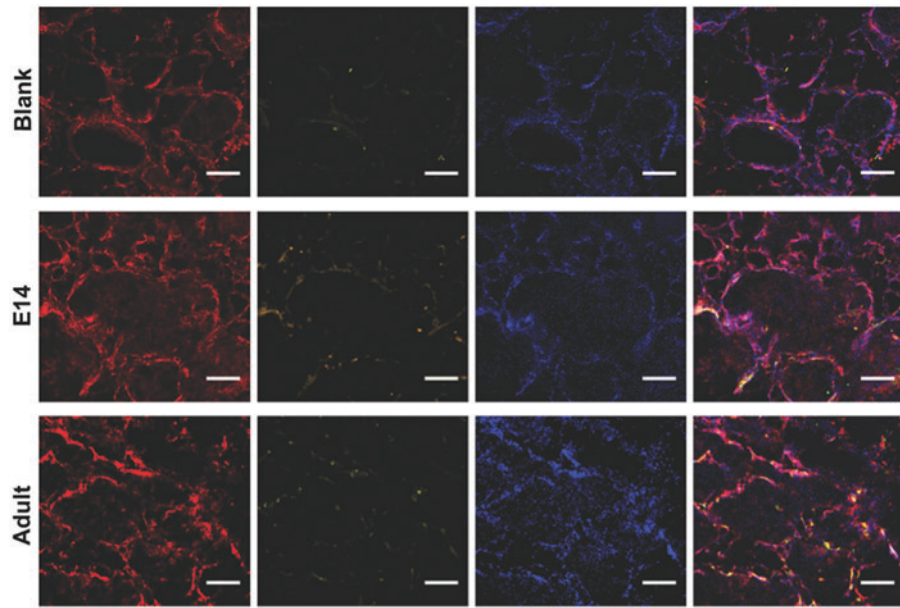

**SUPPLEMENTARY FIG. S3.** Immune cell infiltration of the bridges 7 days after transplantation. CD45<sup>+</sup> leukocytes (*red*) as well as CD<sup>+</sup> T cells (*yellow*) are counterstained with Hoechst (*blue*) for all conditions. Scale bars are 50 µm.
