# Supplementary material
Source: PubMed Central journal article supplement (PMC6238608)
Supplement: Supp_Fig4.pdf [file Supp_Fig4.pdf]

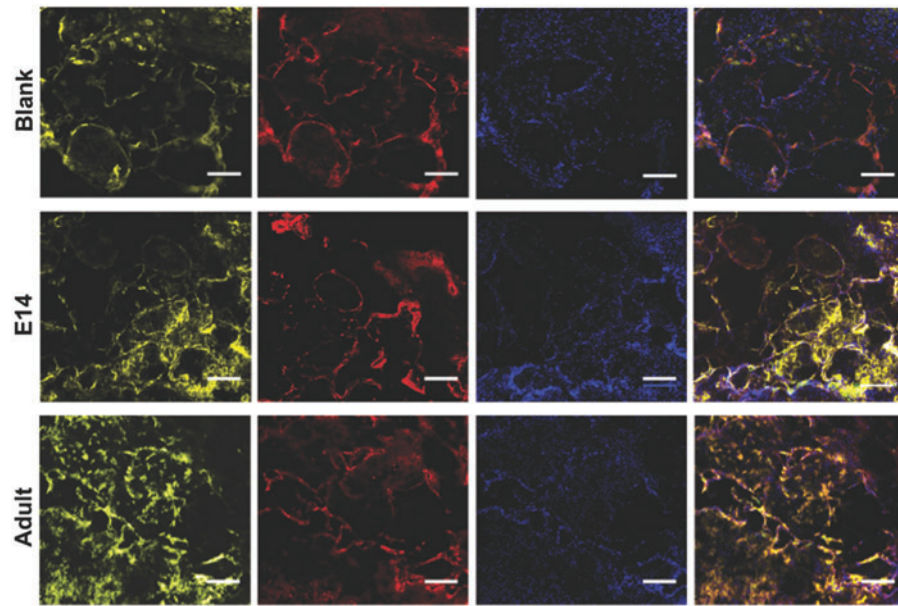

**SUPPLEMENTARY FIG. S4.** Immune cell infiltration of the bridges 7 days after transplantation. Macrophages (F4/80<sup>+</sup>, *yellow*) as well as arginase<sup>+</sup> M2 macrophages (*red*) are counterstained with Hoechst (*blue*) for all conditions. Scale bars 50  $\mu$ m.
